# Supplementary material for: Pleistocene volcanism and shifting shorelines at Lake Tahoe, California
Source: Oxford University Press journal article supplement (doi:10.1130/ges01551.1), 2018-02-07

# 07719-3 Basalt Age Spectrum

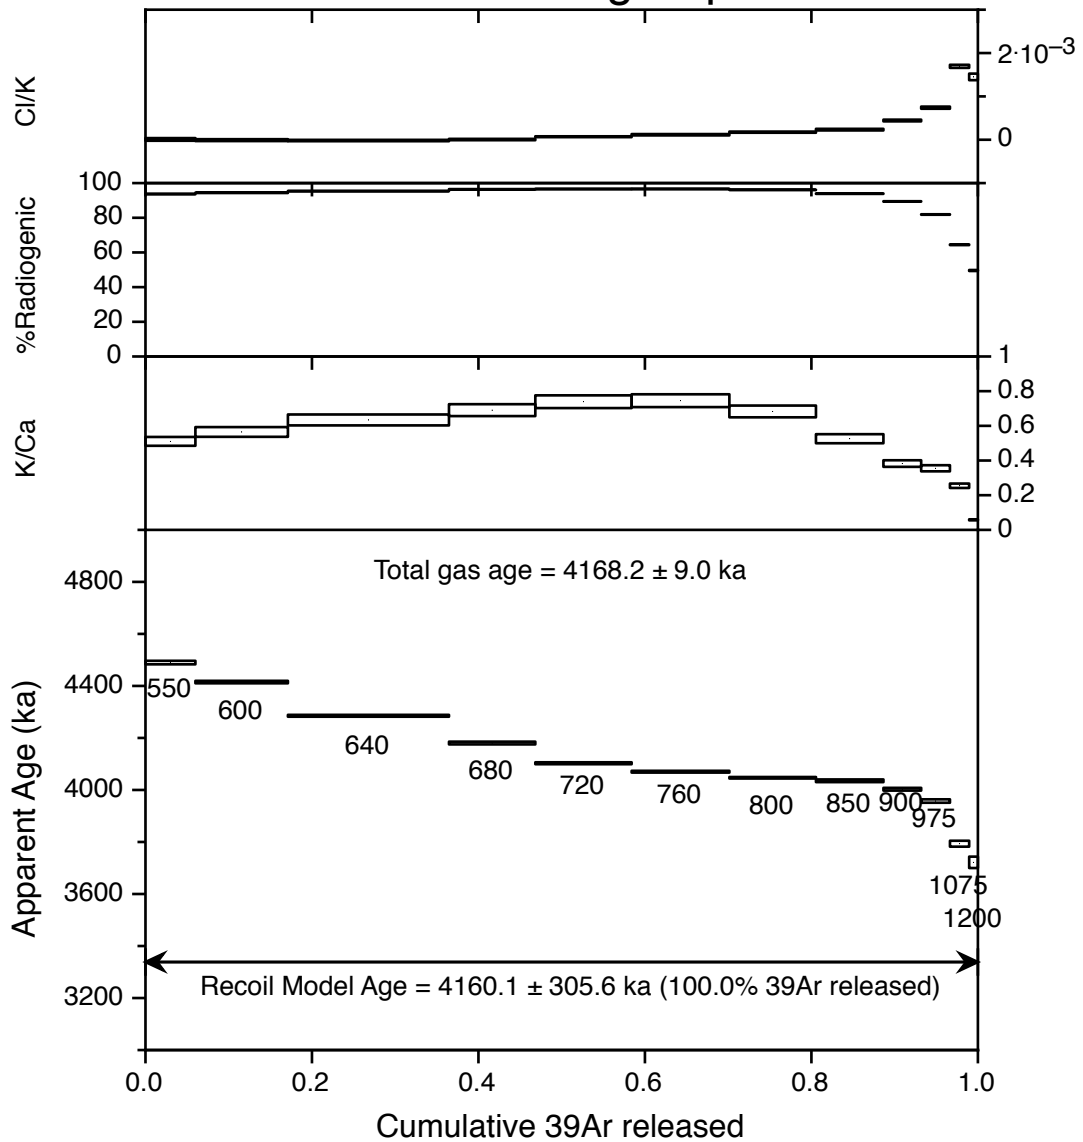

## 07719-3 Basalt Isochron

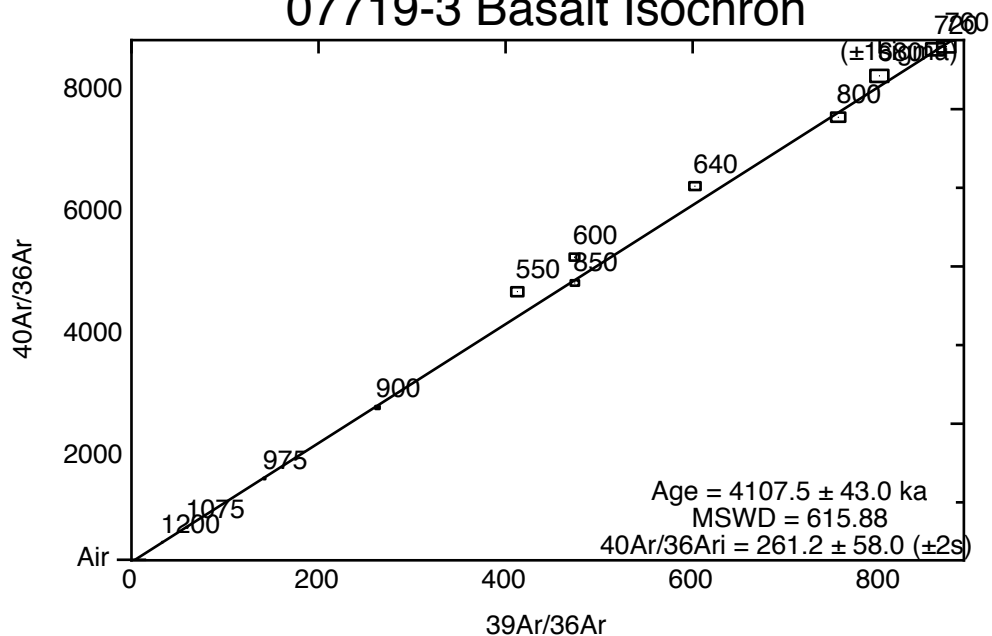

# 6107-5 Basalt Age Spectrum

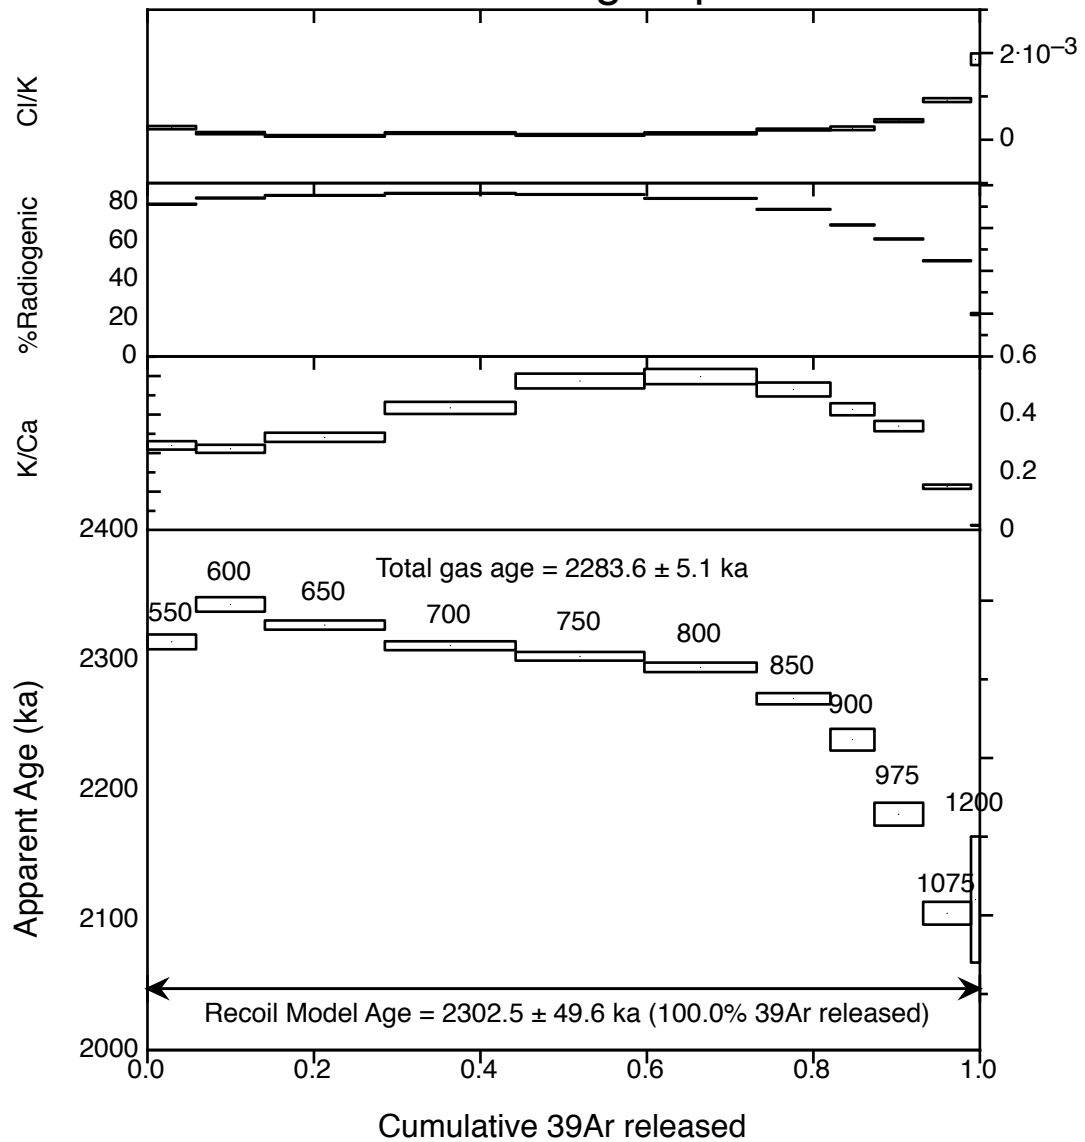

## 6107-5 Basalt Isochron

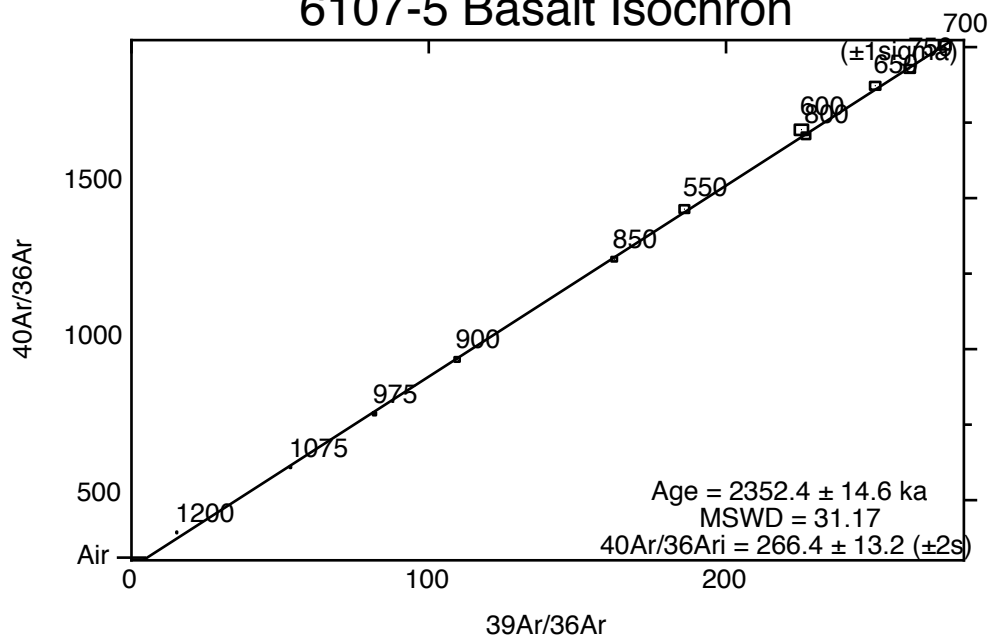

# ER-9 Basalt Age Spectrum

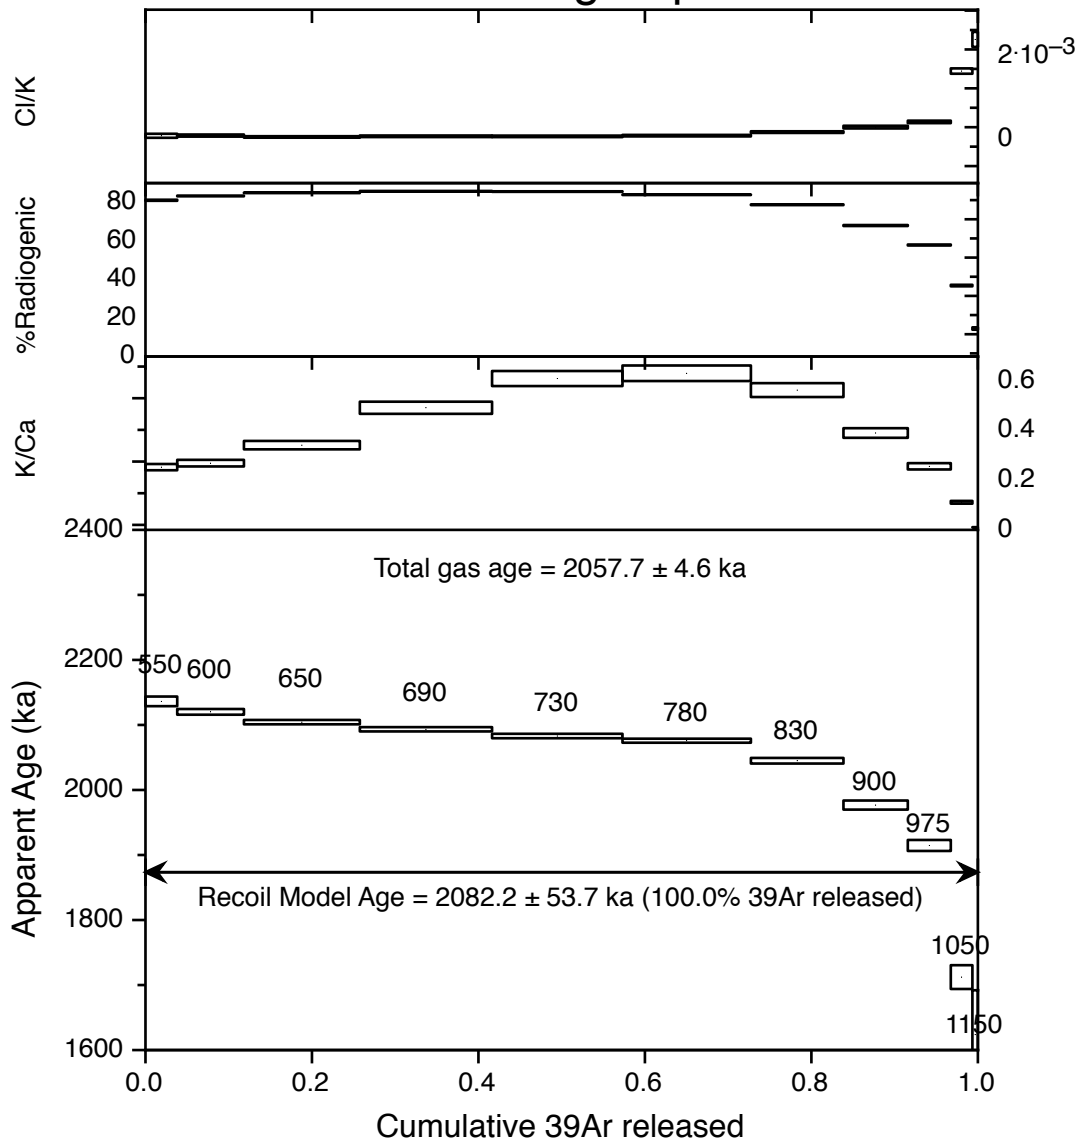

## ER-9 Basalt Isochron

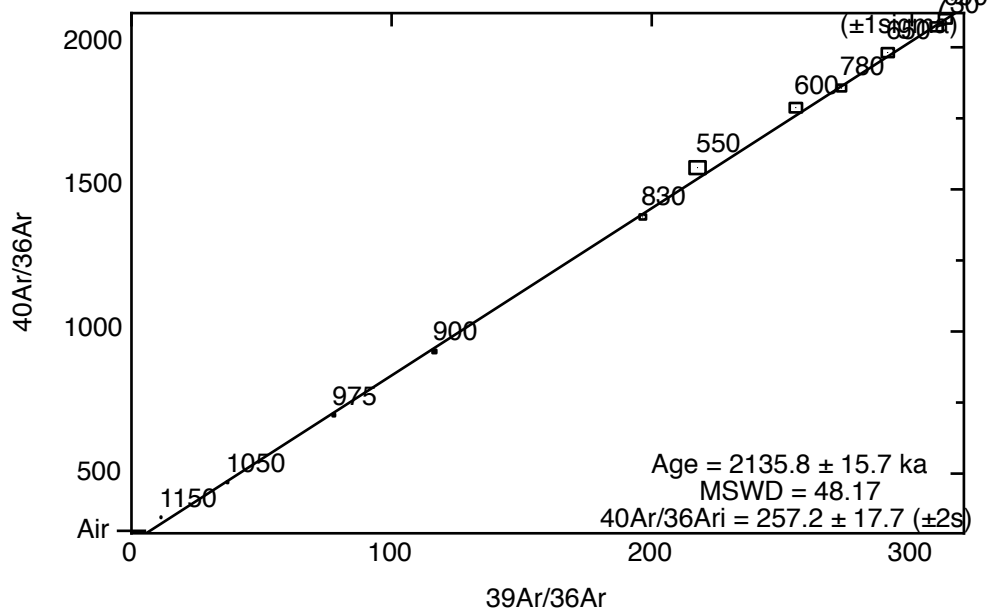

# 0789-4 Basalt Age Spectrum

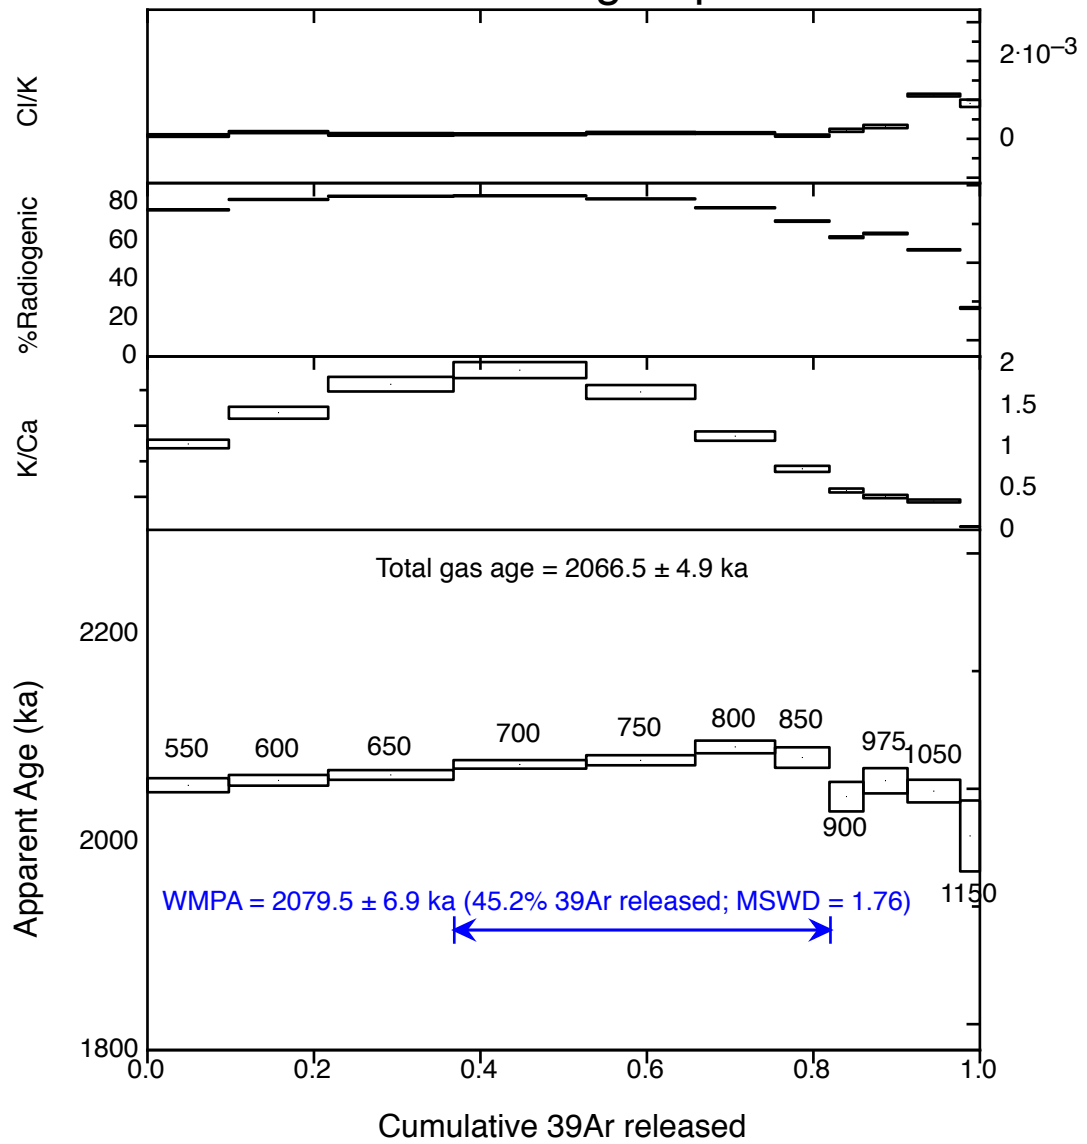

## 0789-4 Basalt Isochron

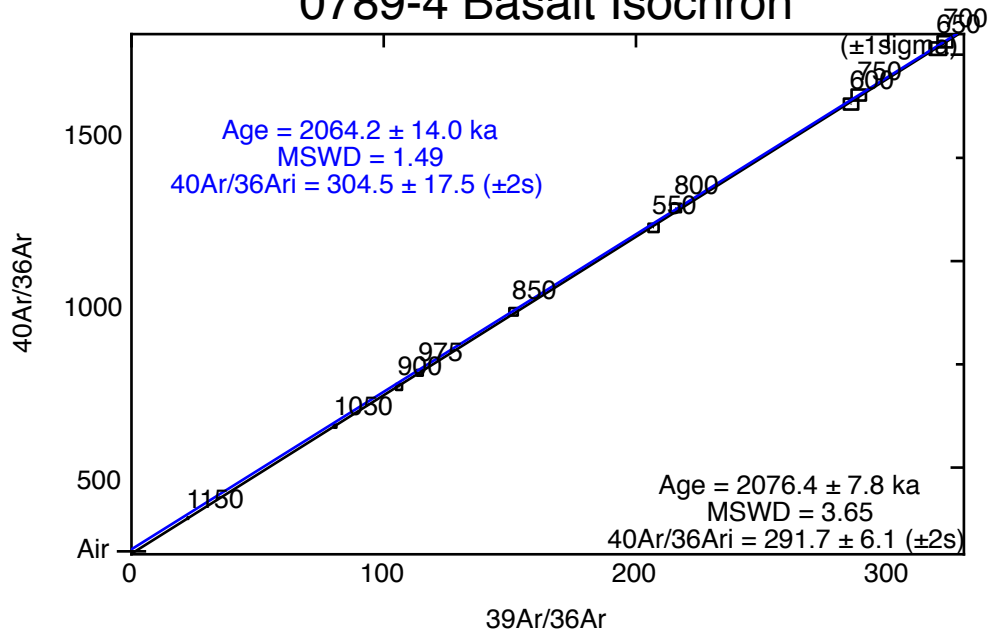

# 71207-1 Basalt Age Spectrum

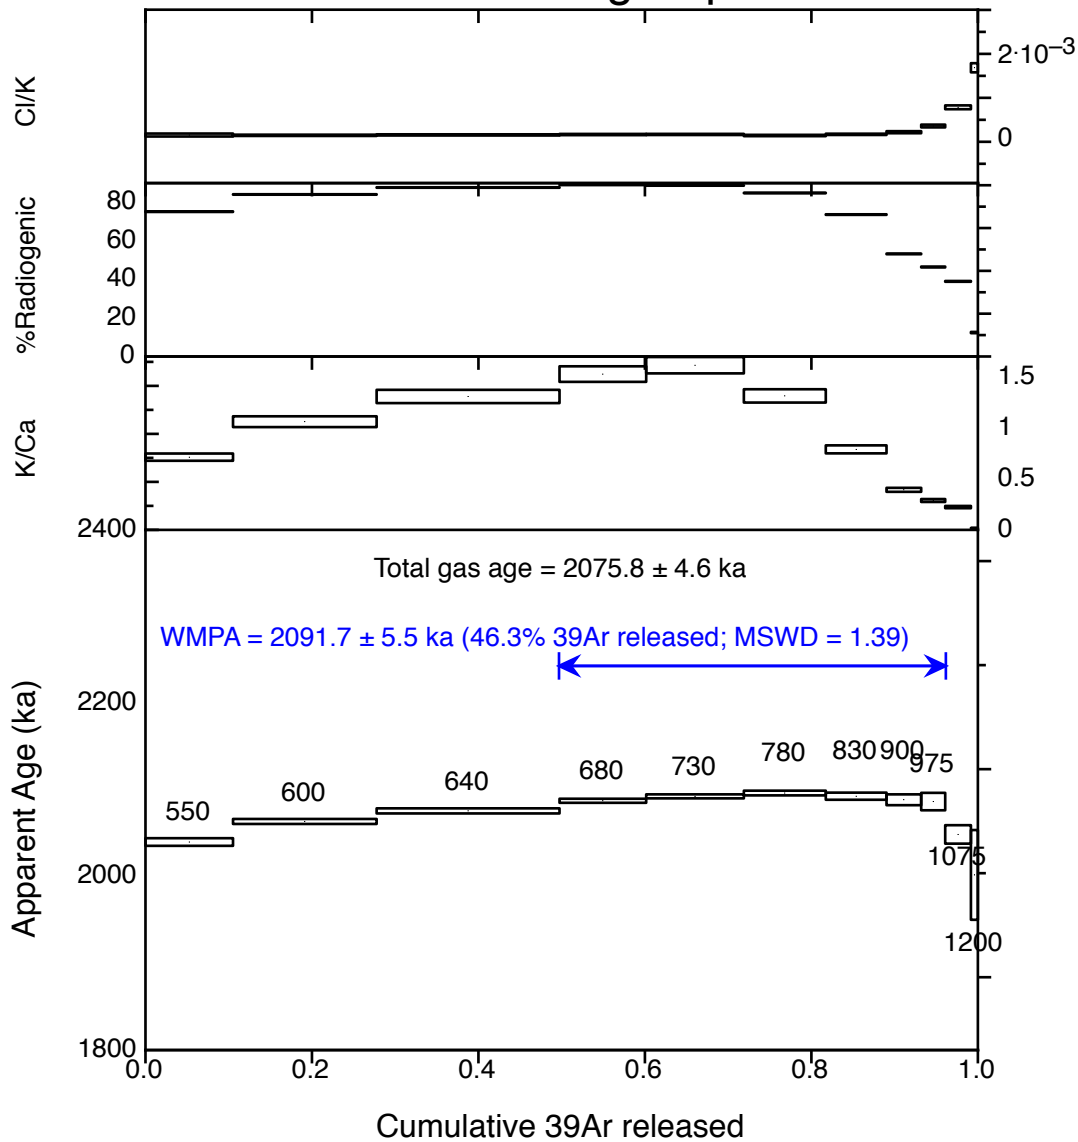

## 71207-1 Basalt Isochron

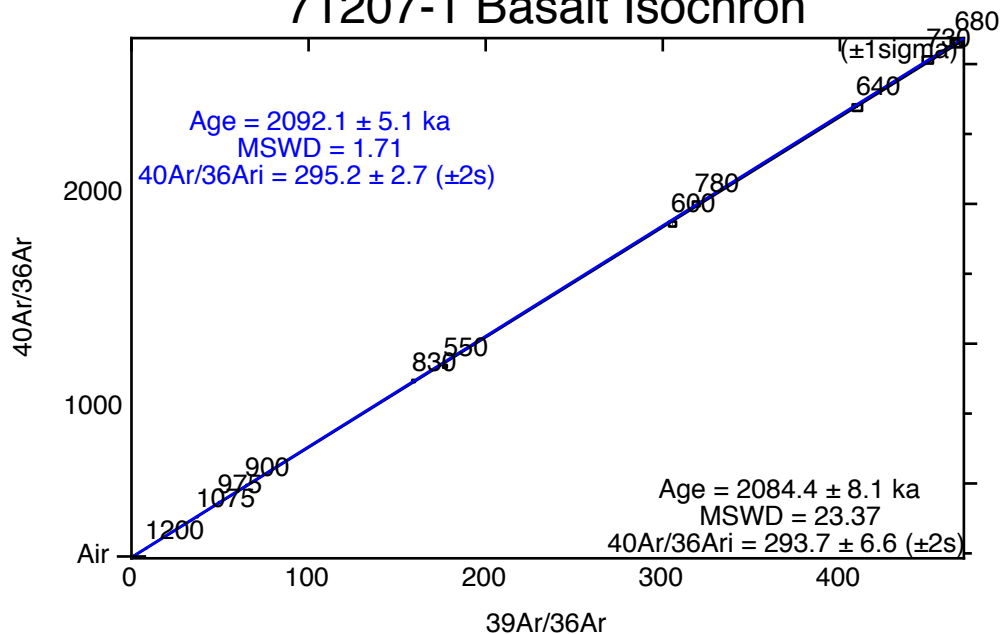

# 081017-1 Basalt Age Spectrum

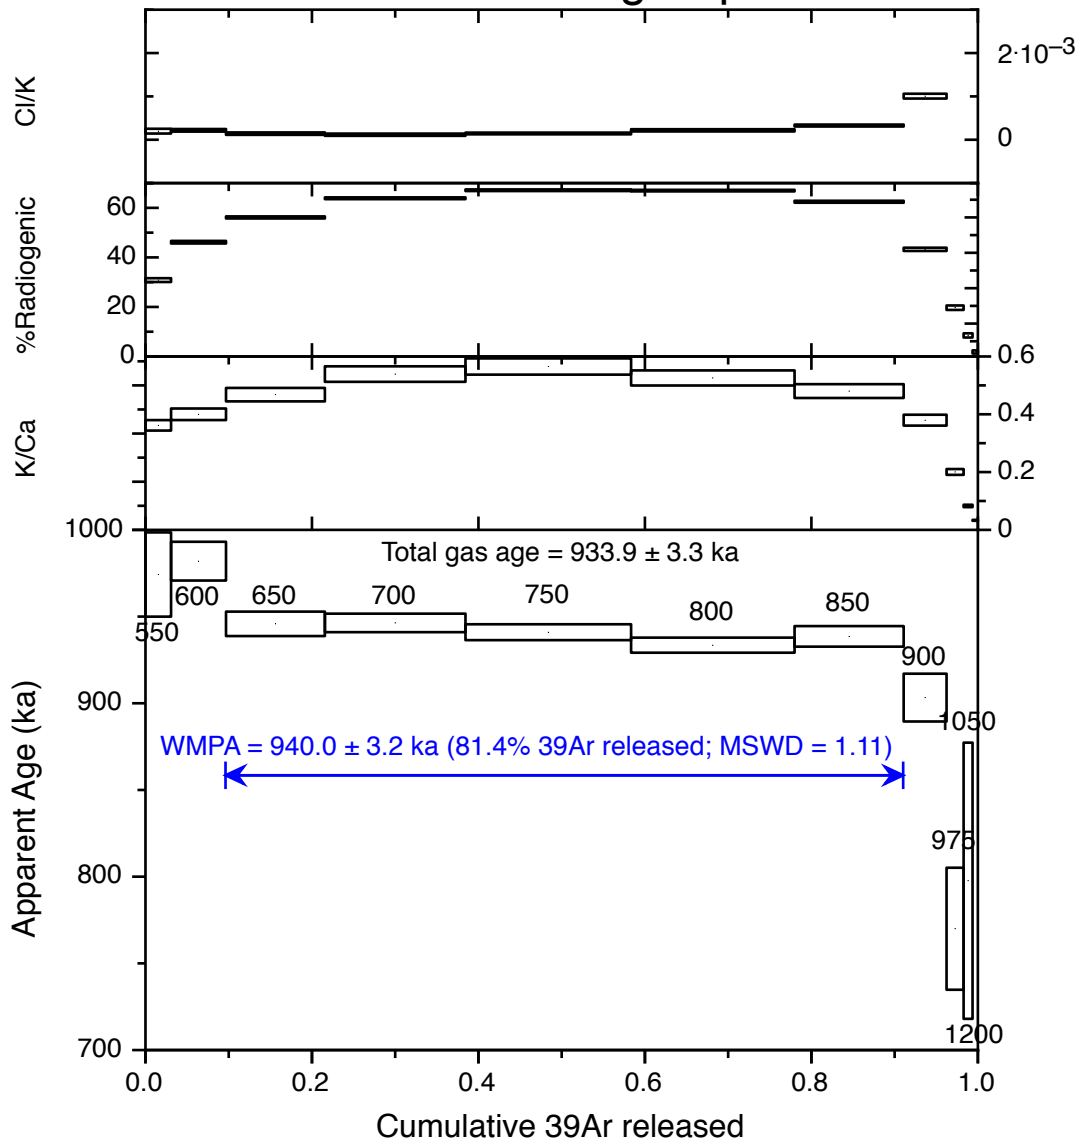

## 081017-1 Basalt Isochron

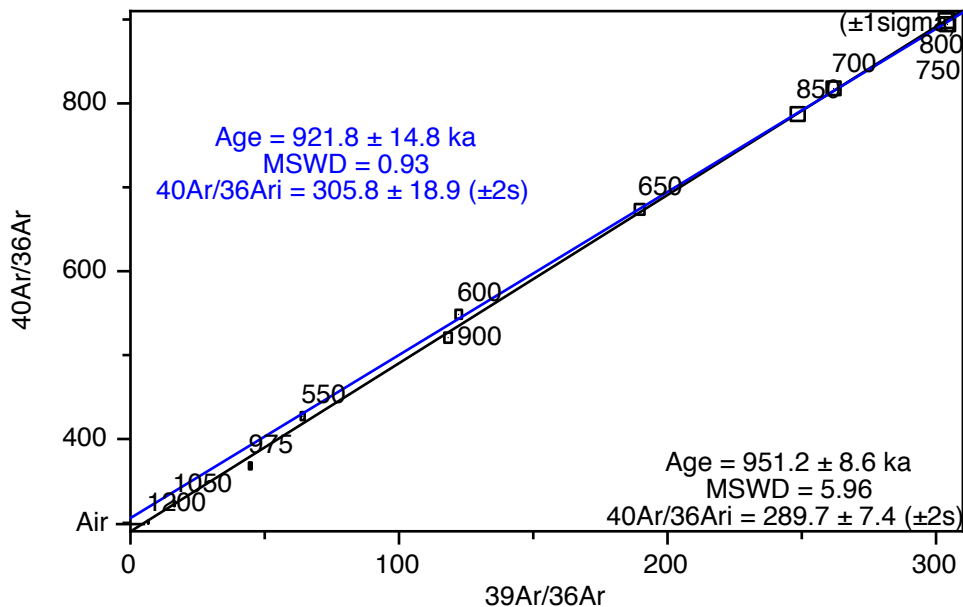

Supplement: ges01551_suppitems.zip [file ges01551_suppitems.zip]
